# Supplementary material for: Enhancement of Cytomegalovirus-Specific Cytokine Production after Modulation of the Costimulation in Kidney Transplant Patients
Source: J Immunol Res. 2019 Feb 25;2019:3926175. doi: 10.1155/2019/3926175 (PMC6410444; doi:10.1155/2019/3926175)
Supplement: Supplementary Materials — The raw data corresponding to Figures 1, 2, and 3 of this study are included within the Supplementary files S1-S3. [file 3926175.f1.xlsx]

## Sheet: S1
Data to Figure 1a (IFN-gamma & PD-L1)
	w/o Ab																		0.1 mg/mL Ab																		1 mg/mL Ab
Patient no.	1	2	3	4	5	6	7	8	9	10	11	12	13	14	15	16	17	18	1	2	3	4	5	6	7	8	9	10	11	12	13	14	15	16	17	18	1	2	3	4	5	6	7	8	9	10	11	12	13
IE-1	6	170	2	135	5	5	0	1	1	45	45	18	6	10	2	4	2	0	15	263	0	47	5	8	4	4	13	129	74	175	12	356	0	2	7	2	16	268	1	35	3	10	0	2	12	122	69	210	13
pp65							96	7	63	26	154	440	45	50	71	86	25	22							134	12	55	80	80	407	16	258	23	182	39	34							160	6	47	76	106	421	10
Lysate	408	360	304	354	107	216	199	318	498	687	407	437	391	699	173	632	246	583	330	397	317	357	127	255	245	376	563	680	361	509	460	699	243	637	279	552	308	331	352	363	155	211	259	330	605	683	392	483	534
neg			1	1	1	0	3	0	5	29	20	120	0	238	0	1	8	6			1	0	0	0	0	0	16	36	23	103	1	191	0	1	9	5			5	0	0	0	0	0	16	39	39	112	0
HEL-299							1	0	15	74	17	101	4	255	1	24	11	12							4	0	205	70	23	80	4	225	5	34	13	17							1	0	16	73	16	89	2
Data to Figure 1b (IL-21 & PD-L1)
	w/o Ab															0.1 mg/mL Ab															1 mg/mL Ab															10 mg/mL Ab
Patient no.	1	2	3	4	5	6	7	8	9	10	11	12	13	14	15	1	2	3	4	5	6	7	8	9	10	11	12	13	14	15	1	2	3	4	5	6	7	8	9	10	11	12	13	14	15	1	2	3	4
IE-1	1	17	7	8	6	5	1	5	44	1	3	29	4	30	2	2	17	7	8	2	5	0	6	66	7	21	27	2	63	3	8	18	8	19	2	7	1	8	69	9	8	37	5	57	5	8	25	10	31
pp65	28	4	100	70	4	6	0	17	9	3	15	16	0	58	5	35	3	80	92	8	71	14	30	15	2	46	28	2	67	3	64	2	81	91	4	61	8	37	17	1	57	15	1	78	10	48	4	58	112
Lysate	81	100	267	120	34	186	245	495	381	133	155	260	26	542	77	107	110	302	138	39	216	264	564	449	167	193	404	20	693	99	144	132	345	156	40	300	296	650	475	226	151	392	25	714	113	172	134	451	176
neg			4	1	1	0	0	0	1	8	2	1	0	30	0			2	1	1	1	1	5	1	2	0	1	1	30	2			1	1	1	0	0	2	1	8	2	0	1	57	1			4	1
HEL-299			0	8	2	1	0	7	19	6	28	3	5	66	6			4	2	0	0	4	10	17	4	31	6	5	48	6			5	2	0	1	1	9	20	6	33	6	9	52	8			0	4
Data to Figure 1c (IL-17A & PD-L1)
	w/o Ab					0.1 mg/mL Ab					1 mg/mL Ab					10 mg/mL Ab
Patient no.	1	2	3	4	5	1	2	3	4	5	1	2	3	4	5	1	2	3	4	5
IE-1	1	1	22	0	2	3	6	28	5	2	2	2	38	12	5	7	1	51	9	3
pp65	4	4	1	0	2	2	4	2	0	1	1	1	5	7	1	3	1	2	0	0
Lysate	1	20	9	12	0	0	7	32	12	1	5	6	12	22	3	1	13	24	27	1
neg	0	0	2	1	2	2	1	0	2	1	9	3	1	1	2	8	4	4	0	0
HEL-299	2	2	0	4	2	33	4	5	1	3	13	1	3	2	0	15	0	1	1	1
[truncated: 23 more columns]

## Sheet: S2
Data to Figure 2a (IL-21 & PD-1)
	w/o Ab															0.5 mg/mL Ab															1 mg/mL Ab															10 mg/mL Ab
Patient no.	1	2	3	4	5	6	7	8	9	10	11	12	13	14	15	1	2	3	4	5	6	7	8	9	10	11	12	13	14	15	1	2	3	4	5	6	7	8	9	10	11	12	13	14	15	1	2	3	4
IE-1	5	44	1	3	29	4	30	2	4	2	2	1	5	9	3	3	60	8	18	30	1	48	3	7	4	2	53	11	16	4	6	44	3	15	25	5	62	3	7	1	0	71	7	19	2	5	46	8	17
pp65	17	9	3	15	16	0	58	5	10	26	13	97	1	0	2	38	12	1	50	21	1	70	12	12	19	13	141	1	3	6	50	13	1	50	13	0	114	4	18	29	27	210	6	3	2	71	9	0	55
Lysate	495	381	133	155	260	26	542	77	190	267	71	341	465	345	41	593	393	154	184	296	20	693	109	130	469	97	358	462	384	61	587	403	118	164	369	19	609	116	89	451	96	343	475	374	100	624	416	155	135
neg	0	1	8	2	1	0	30	0	2	2	3	49	0	1	0	0	0	3	1	0	2	33	1	9	0	2	30	0	0	1	1	1	3	2	0	1	36	0	3	0	4	45	4	0	2	3	0	1	1
HEL-299	7	19	6	28	3	5	66	6	7	8	6	69	14	13	11	7	12	8	21	4	5	62	1	7	12	7	77	9	9	12	5	12	1	19	4	3	45	2	8	5	2	44	13	9	10	12	7	4	23
Data to Figure 2b (IFN-gamma & PD-L1 & PD-1)
	w/o Ab							10 mg/mL Ab + 5 µg/mL Ab
Patient no.	1	2	3	4	5	6	7	1	2	3	4	5	6	7
IE-1	49	4	2	0	0	0	9	113	1	19	2	1	8	17
pp65	64	86	25	22	63	643	115	83	120	39	43	90	660	102
Lysate	667	600	173	617	95	631	669	659	621	229	601	95	634	693
neg	0	1	0	2	0	1	1	1	5	23	2	0	8	2
HEL-299	60	19	19	4	1	4	25	72	34	22	12	2	3	32
Data to Figure 2c (IL-21 & PD-L1 & PD-1)
	w/o Ab							10 mg/mL Ab + 5 µg/mL Ab
Patient no.	1	2	3	4	5	6	7	1	2	3	4	5	6	7
IE-1	7	2	1	4	3	1	5	10	0	4	5	6	1	11
pp65	8	3	2	5	33	6	9	17	4	3	3	32	9	13
Lysate	125	37	90	131	172	36	286	155	48	109	149	205	46	421
neg	0	1	1	1	1	1	1	0	1	0	1	3	0	1
HEL-299	13	19	1	12	6	2	8	12	5	0	12	4	7	26
[truncated: 11 more columns]

## Sheet: S3
Data to Figure 3a (IFN-gamma & PD-L1)
Lysate	w/o Ab						0.1 mg/mL Ab						1 mg/mL Ab						10 mg/mL Ab
Control no.	1	2	3	4	5	6	1	2	3	4	5	6	1	2	3	4	5	6	1	2	3	4	5	6
w/o	325	186	255	435	653	637	314	179	289	412	658	564	242	215	309	324	668	633	330	272	294	357	671	629
Tacrolimus	64	9	15				75	9	34				99	6	25				90	9	29
Rapamycin	288	208		462	624	572	351	142		505	654	432	320	143		461	658	516	314	172		504	646	558
Tac.+Rapa.	54	7	12				68	10	15				82	5	29				113	9	20
HEL-299	w/o Ab						0.1 mg/mL Ab						1 mg/mL Ab						10 mg/mL Ab
Control no.	1	2	3	4	5	6	1	2	3	4	5	6	1	2	3	4	5	6	1	2	3	4	5	6
w/o	2	1	0	0	6	5	1	0	2	5	6	8	0	0	1	2	6	5	0	1	2	2	2	4
Tacrolimus	1	1	0				0	0	1				0	0	0				0	1	1
Rapamycin	0	0		4	9	1	0	0		0	10	4	1	1		3	5	1	1	1		1	9	5
Tac.+Rapa.	1	0	1				0	1	1				0	0	1				3	0	1
Data to Figure 3b (IL-21 & PD-L1)
Lysate	w/o Ab						0.1 mg/mL Ab						1 mg/mL Ab						10 mg/mL Ab
Control no.	1	2	3	4	5	6	1	2	3	4	5	6	1	2	3	4	5	6	1	2	3	4	5	6
w/o	44	18	51	258	291	134	74	41	74	321	317	171	72	28	74	223	354	203	62	68	81	303	370	150
Tacrolimus	2	4	1				3	1	4				1	1	3				2	3	1
Rapamycin	21	24		173	139	51	32	21		99	205	89	61	23		194	210	66	60	27		192	272	80
Tac.+Rapa.	1	1	0				3	1	0				1	1	0				1	1	1
HEL-299	w/o Ab						0.1 mg/mL Ab						1 mg/mL Ab						10 mg/mL Ab
Control no.	1	2	3	4	5	6	1	2	3	4	5	6	1	2	3	4	5	6	1	2	3	4	5	6
w/o	0	3	0	3	11	6	0	1	1	7	4	4	3	4	2	3	10	2	1	2	4	5	2	2
Tacrolimus	3	0	1				0	1	0				0	1	0				2	1	2
Rapamycin	0	2		2	9	3	1	0		4	6	4	0	0		5	5	7	1	0		2	4	7
Tac.+Rapa.	1	0	0				1	1	1				0	0	0				1	0	4
